# Supplementary material for: Effects of Different Scan Projections on the Quantitative Ultrasound-Based Evaluation of Hepatic Steatosis
Source: MDPI journal article supplement (doi:10.3390/healthcare10020374), 2022-02-14
Supplement: s1 [file s1]

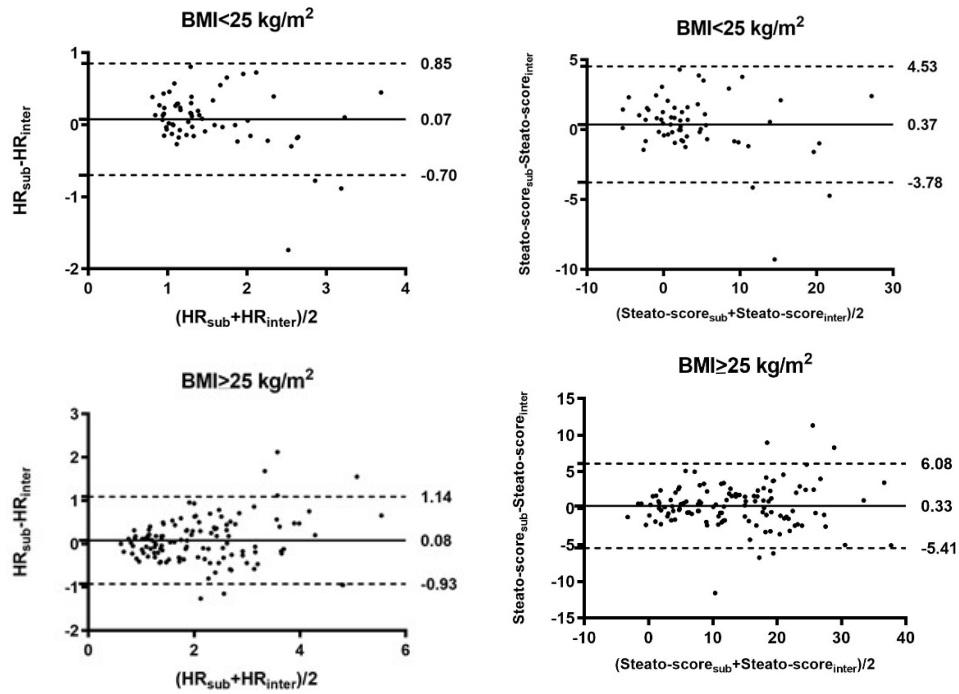

**Figure S1:** Bland-Altman plots of HR and Steato-score measurements assessed with two different scan views and splitting the population in two classes according BMI value (cutoff 25 kg/m<sup>2</sup>). The two dashed lines represent the limits of agreements from  $-1.96 \times SD$  to  $+1.96 \times SD$ , and the continue line represents the average difference (bias) in measurements between the two different ultrasound scans.

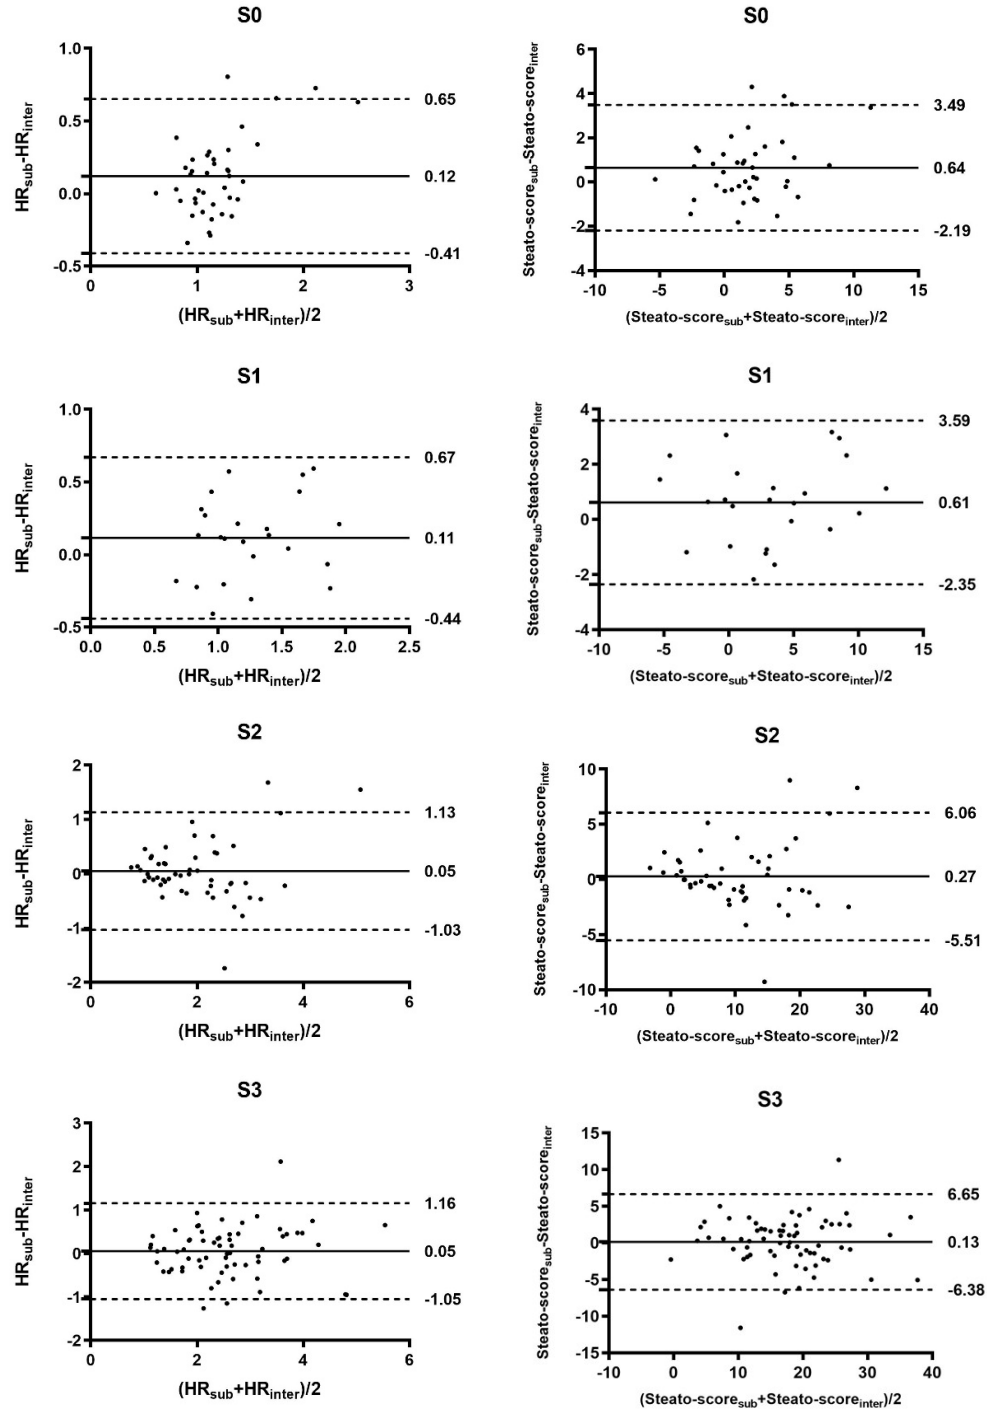

**Figure S2:** Bland-Altman plots of HR and Steato-score measurements assessed with two different scan views and by stratifying the whole population in four classes obtained by the qualitative classification of steatosis level (S0: absence of steatosis; S1: mild steatosis; S2: moderate steatosis; S3: severe steatosis). The two dashed lines represent the limits of agreements from  $-1.96 \times SD$  to  $+1.96 \times SD$ , and the continue line represents the average difference (bias) in measurements between the two different ultrasound scans.
